# Supplementary material for: Stepwise engineering of pore environments and enhancement of CO2/R22 adsorption capacity through dynamic spacer installation and functionality modification
Source: Royal Society of Chemistry journal article supplement (doi:10.1039/c7cc06352k), 2017-01-01
Supplement: c7cc06352k1.pdf [file c7cc06352k1.pdf]

## **Supporting Information**

# **Stepwise Engineering Pore Environment and Enhancing CO<sub>2</sub>/R22 Adsorption Capacity through Dynamic Spacer Installation and Functionality Modification**

Cheng-Xia Chen, Qian-Feng Qiu, Chen-Chen Cao, Mei Pan, Hai-Ping Wang, Ji-Jun Jiang, Zhang-Wen Wei\*, Kelong Zhu, Guangqin Li and Cheng-Yong Su\*

*MOE Laboratory of Bioinorganic and Synthetic Chemistry, Lehn Institute of Functional materials, School of Chemistry, Sun Yat-Sen University, Guangzhou 510275, China.*

*Email: weizhw3@mail.sysu.edu.cn; ccsscy@mail.sysu.edu.cn*

## S1. Materials and Instrumentation

All the reagents and solvents were purchased from commercial sources and directly utilized without further purification. Solid-state IR spectra were recorded using Nicolet/Nexus-670 FT-IR spectrometer in the region of 4000-400  $\text{cm}^{-1}$  using KBr pellets. Single crystal X-ray diffraction data were collected on an Agilent Technologies SuperNova X-RAY diffractometer system equipped with a Cu sealed tube ( $\lambda = 1.54178$ ) at 50 kV and 0.80 mA. Powder X-ray diffraction (PXRD) was carried out with a RigakuSmartLab diffractometer (Bragg-Brentano geometry, Cu  $K\alpha 1$  radiation,  $\lambda = 1.54056 \text{ \AA}$ ). Thermogravimetric analyses (TGA) were performed on a NETZSCH TG209 system in nitrogen and under 1 atm of pressure at a heating rate of 10  $^{\circ}\text{C min}^{-1}$ . Nuclear magnetic resonance (NMR) data were collected on a 400 MHz Nuclear Magnetic Resonance Spectrometer. Gas adsorption isotherms for pressures in the range of 0-1.0 bar were obtained by a volumetric method using a quantachrome autosorb-iQ2-MP gas adsorption analyzer. Gas adsorption measurements were performed using ultra-high purity  $\text{N}_2$ ,  $\text{CH}_4$ ,  $\text{CO}_2$  and R22 gases.

## S2. Ligand Synthesis

2,2'-dimethylbiphenyl-4,4'-dicarboxylic acid ( $\text{H}_2\text{L}^1$ ),<sup>1</sup> 2'-(azidomethyl)-[1,1':4',1''-terphenyl]-4,4''-dicarboxylic acid ( $\text{H}_2\text{L}^2$ ),<sup>2</sup> 2',5'-bis(azidomethyl)-[1,1':4',1''-terphenyl]-4,4''-dicarboxylic acid ( $\text{H}_2\text{L}^3$ ),<sup>2</sup> and 2',3',5',6'-tetrakis(azidomethyl)-[1,1':4',1''-terphenyl]-4,4''-dicarboxylic acid ( $\text{H}_2\text{L}^4$ )<sup>2</sup> were synthesised and characterised based on literature procedures.

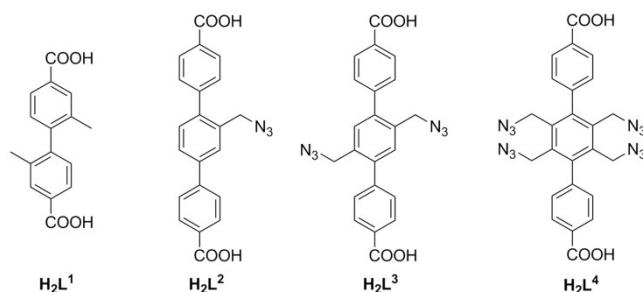

**Scheme S1** The structures of ligands.

## **S3. MOF Synthesis**

### **3.1 Synthesis of PCN-700-o and PCN-700-c**

PCN-700 and PCN-700-c were prepared using a modified literature procedure.<sup>1</sup>

### **3.2 Synthesis of LIFM-90**

PCN-700-o (10 mg),  $\text{H}_2\text{L}^1$  (1.7 mg),  $\text{H}_2\text{L}^2$  (2.4 mg) and DMF (2.0 mL) were charged in a vial. The mixture was heated in a 85 °C oven for 40 h. The crystals were washed with DMF (3×), soaked in DMF (5 mL) at 85 °C for 24 h, and finally washed with DMF again (3×) (11.3 mg, yield: 89.0 %). FTIR (KBr):  $\nu = 2941$  (w), 2097 (m), 1591 (s), 1547 (s), 1414 (s), 1334 (s), 1208 (w), 1140 (w), 1023 (s), 847 (s), 773 (s), 681 (w), 655 (s)  $\text{cm}^{-1}$ .

### **3.3 Synthesis of LIFM-91**

Propargylamine (50  $\mu\text{L}$ ) were added to a mixture of LIFM-90 (100 mg) and CuI (3.0 mg) in DMF (2.0 ml) in 5 mL round-bottom flask. The reaction mixture was stirred at 60 °C for 30 h. The resulting precipitate was collected by centrifugation, washing with DMF, metanol, and drying to afford brown solid in quantitative yield. FTIR (KBr):  $\nu = 3306$  (w), 2941 (w), 1593 (m), 1548 (m), 1415 (s), 1384 (s), 1208 (w), 1140 (w), 1024 (s), 908 (w), 779 (s), 656 (s)  $\text{cm}^{-1}$ .

### **3.4 Synthesis of LIFM-92**

PCN-700-o (10 mg),  $\text{H}_2\text{L}^1$  (1.7 mg),  $\text{H}_2\text{L}^3$  (2.7 mg) and DMF (2.0 mL) were charged in a vial. The mixture was heated in a 85 °C oven for 40 h. The crystals were washed with DMF (3×), soaked in DMF (5 mL) at 85 °C for 24 h, and finally washed with DMF again (3×) (12.3 mg, yield: 97.6 %). FTIR (KBr):  $\nu = 3313$  (w), 2095 (m), 1589 (m), 1545 (m), 1414 (s), 1384 (s), 1207 (w), 1140 (w), 1007 (m), 908 (w), 849 (w), 778 (s), 654 (s)  $\text{cm}^{-1}$ .

### **3.5 Synthesis of LIFM-93**

Propargylamine (100  $\mu\text{L}$ ) were added to a mixture of LIFM-92 (100 mg) and CuI (3.0 mg) in DMF (2.0 ml) in 5 mL round-bottom flask. The reaction mixture was stirred at 60 °C for 30 h. The resulting precipitate was collected by centrifugation, washing with DMF, metanol, and drying to afford brown solid in quantitative yield.

FTIR (KBr):  $\nu = 3305$  (m), 2942 (w), 2830 (w), 1591 (m), 1547 (m), 1412 (s), 1384 (s), 1208 (w), 1119 (w), 1022 (s), 779 (m), 654 (s)  $\text{cm}^{-1}$ .

### 3.6 Synthesis of LIFM-94

PCN-700-o (10 mg),  $\text{H}_2\text{L}^1$  (1.7 mg),  $\text{H}_2\text{L}^4$  (3.4 mg) and DMF (2.0 mL) were charged in a vial. The mixture was heated in a 85 °C oven for 40 h. The crystals were washed with DMF (3 $\times$ ), soaked in DMF (5 mL) at 85 °C for 24 h, and finally washed with DMF again (3 $\times$ ) (12.8 mg, yield: 94.1 %). FTIR (KBr):  $\nu = 2941$  (w), 2092 (m), 1590 (m), 1547 (m), 1414 (s), 1385 (s), 1207 (w), 1141 (w), 1022 (s), 908 (w), 849 (w), 775(s), 681 (m), 655 (s)  $\text{cm}^{-1}$ .

### 3.7 Synthesis of LIFM-95

Propargylamine (190  $\mu\text{L}$ ) were added to a mixture of LIFM-94 (100 mg) and CuI (3.0 mg) in DMF (2.0 mL) in 5 mL round-bottom flask. The reaction mixture was stirred at 60 °C for 30 h. The resulting precipitate was collected by centrifugation, washing with DMF, metanol, and drying to afford brown solid in quantitative yield. FTIR (KBr):  $\nu = 3281$  (w), 2943 (w), 2867 (m), 1593 (m), 1546 (m), 1412 (s), 1382 (s), 1208 (w), 1140 (w), 1022 (s), 777 (s), 653 (s)  $\text{cm}^{-1}$ .

## S4. Single Crystal X-Ray Crystallography

Single crystal of LIFM-90, LIFM-92 and LIFM-94 were carefully picked and coated in paratone oil, attached to a glass silk which was inserted into a stainless steel stick, then quickly transferred to the Agilent Gemini S Ultra CCD Diffractometer with the Enhance X-ray Source of Cu radiation ( $\lambda = 1.54178 \text{ \AA}$ ) using the  $\omega$ - $\phi$  scan technique. All of the structures were solved by direct methods and refined by full-matrix least squares against  $F^2$  using the SHELXL programs.<sup>3</sup> Hydrogen atoms were placed in geometrically calculated positions and included in the refinement process using riding model with isotropic thermal parameters:  $U_{\text{iso}}(\text{H}) = 1.2 \text{ Ueq}(-\text{CH})$ . All the electrons of disordered solvent molecules which cannot be determined, are removed by SQUEEZE routine of PLATON program.<sup>4</sup> Crystal and refinement parameters are listed in Table S1.

**Table S1** Crystallographic data for LIFM-90, LIFM-92 and LIFM-94

| Compound                                            | LIFM-90                                                                         | LIFM-92                                                                         | LIFM-94                                                                          |
|-----------------------------------------------------|---------------------------------------------------------------------------------|---------------------------------------------------------------------------------|----------------------------------------------------------------------------------|
| CCDC No.                                            | 1544323                                                                         | 1544324                                                                         | 1544325                                                                          |
| Formula                                             | C <sub>101</sub> H <sub>73</sub> N <sub>3</sub> O <sub>32</sub> Zr <sub>6</sub> | C <sub>102</sub> H <sub>74</sub> N <sub>6</sub> O <sub>32</sub> Zr <sub>6</sub> | C <sub>104</sub> H <sub>76</sub> N <sub>12</sub> O <sub>34</sub> Zr <sub>6</sub> |
| Formula Weight                                      | 2387.94                                                                         | 2442.99                                                                         | 2585.08                                                                          |
| Shape / Color                                       | Block / Colorless                                                               | Block/<br>Colorless                                                             | Block/<br>Colorless                                                              |
| Crystal System                                      | Tetragonal                                                                      | Tetragonal                                                                      | Tetragonal                                                                       |
| Space Group                                         | <i>P4<sub>2</sub>/mmc</i>                                                       | <i>P4<sub>2</sub>/mmc</i>                                                       | <i>P4<sub>2</sub>/mmc</i>                                                        |
| <i>T</i> (K)                                        | 173(2)                                                                          | 173(2)                                                                          | 173(2)                                                                           |
| <i>a</i> (Å)                                        | 23.0842(1)                                                                      | 23.1092(10)                                                                     | 23.0742(4)                                                                       |
| <i>b</i> (Å)                                        | 23.0842(1)                                                                      | 23.1092(10)                                                                     | 23.0742(4)                                                                       |
| <i>c</i> (Å)                                        | 18.7738(2)                                                                      | 18.795(3)                                                                       | 18.6187(8)                                                                       |
| $\alpha / \beta / \gamma$ (°)                       | 90.0 / 90 / 90                                                                  | 90.0 / 90 / 90                                                                  | 90.0 / 90 / 90                                                                   |
| <i>V</i> (Å <sup>3</sup> )                          | 10004.19(14)                                                                    | 10037.57(18)                                                                    | 9912.9(5)                                                                        |
| <i>Z</i>                                            | 2                                                                               | 2                                                                               | 2                                                                                |
| <i>D</i> <sub>calc</sub> (g/cm <sup>3</sup> )       | 0.793                                                                           | 0.808                                                                           | 0.866                                                                            |
| $\mu$ (mm <sup>-1</sup> )                           | 2.822                                                                           | 2.825                                                                           | 2.897                                                                            |
| <i>F</i> (000)                                      | 2392                                                                            | 2448                                                                            | 2592                                                                             |
| <i>R</i> <sub>int</sub>                             | 0.0275                                                                          | 0.0320                                                                          | 0.0538                                                                           |
| Reflections collected / unique                      | 18268 / 4546                                                                    | 19865 / 4585                                                                    | 19426 / 4560                                                                     |
| Completeness to theta                               | 97.7 %                                                                          | 98.3 %                                                                          | 98.4 %                                                                           |
| Data / Restraints / parameters                      | 4546 / 337 / 282                                                                | 4585 / 291 / 222                                                                | 4560 / 475 / 302                                                                 |
| <i>R</i> <sub>1</sub> [ <i>I</i> > 2σ( <i>I</i> )]  | 0.0603                                                                          | 0.0581                                                                          | 0.0926                                                                           |
| <i>wR</i> <sub>2</sub> [ <i>I</i> > 2σ( <i>I</i> )] | 0.1943                                                                          | 0.1892                                                                          | 0.2422                                                                           |
| <i>R</i> <sub>1</sub> (all data)                    | 0.0644                                                                          | 0.0674                                                                          | 0.1265                                                                           |
| <i>wR</i> <sub>2</sub> (all data)                   | 0.1996                                                                          | 0.2037                                                                          | 0.2878                                                                           |
| <i>GOF</i>                                          | 1.063                                                                           | 1.133                                                                           | 1.059                                                                            |

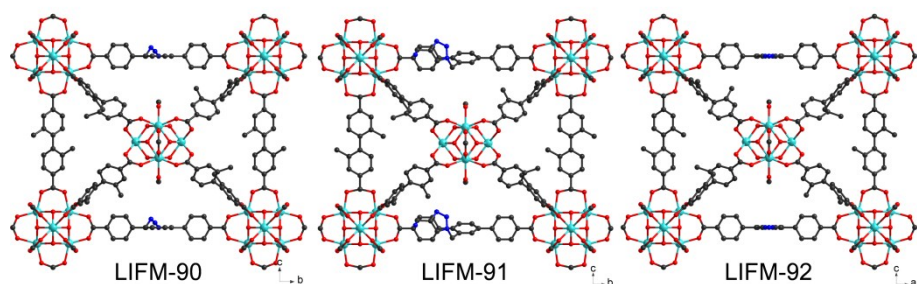

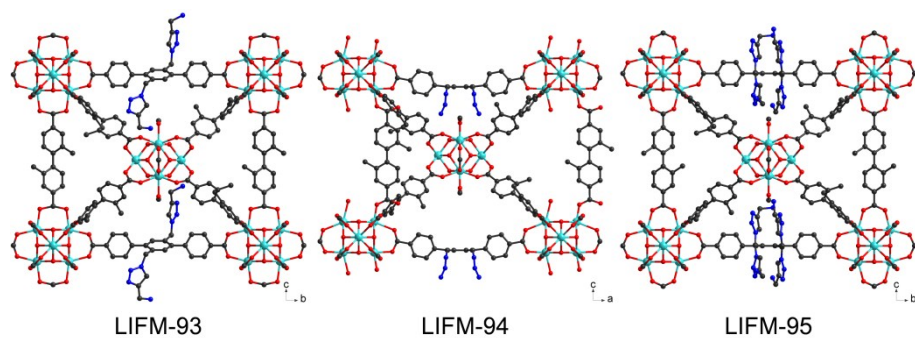

**Fig. S1** Presenting the installed spacers in LIFM-90—95. Color scheme: grey, C; red, O; aqua, Zr; blue, N. All hydrogen atoms are omitted for clarity (Structures of LIFM-91, LIFM-93 and LIFM-95 are obtained from a simple simulation with Materials Studio 6.1 and only used for general presentation.<sup>5</sup>)

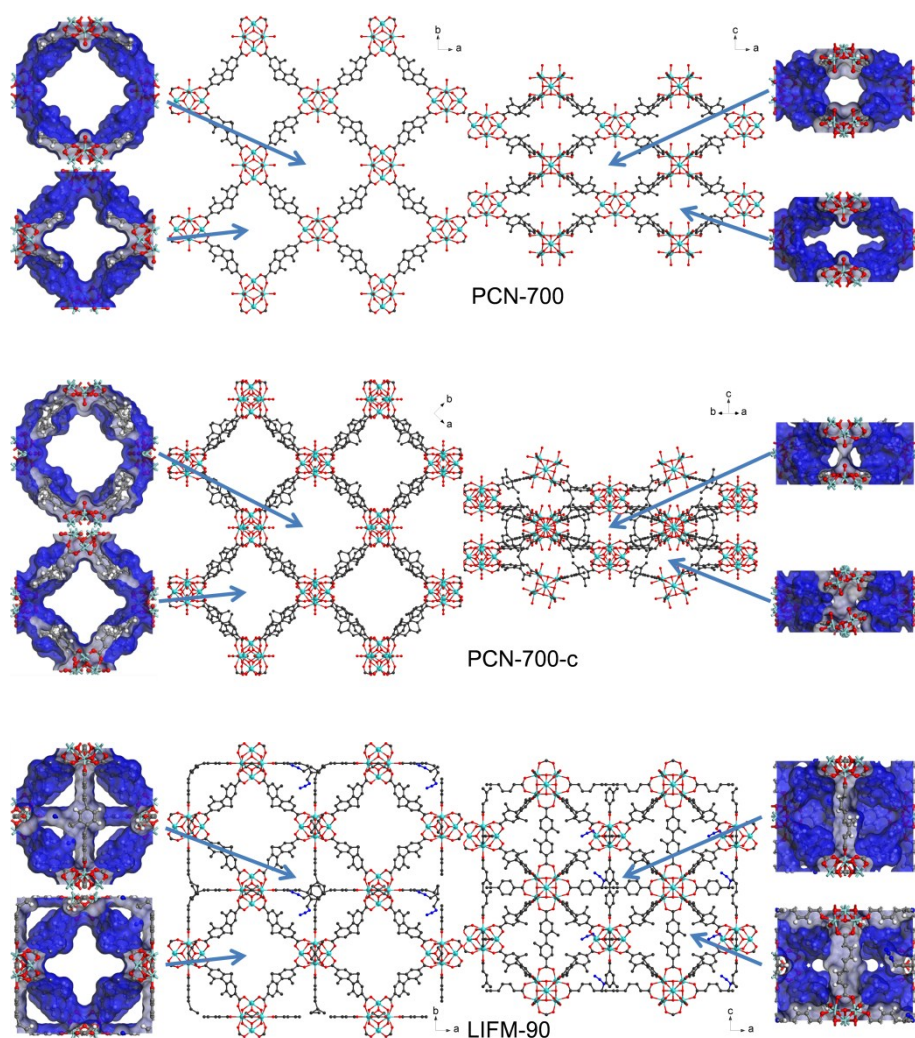

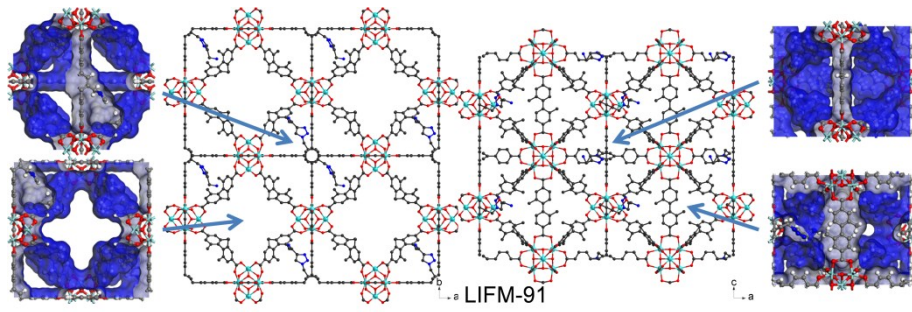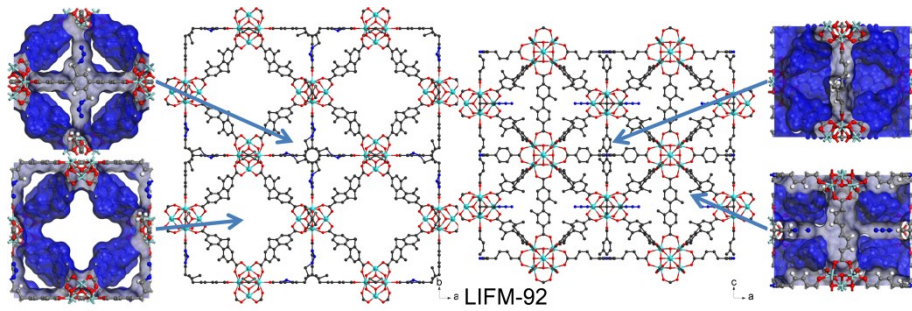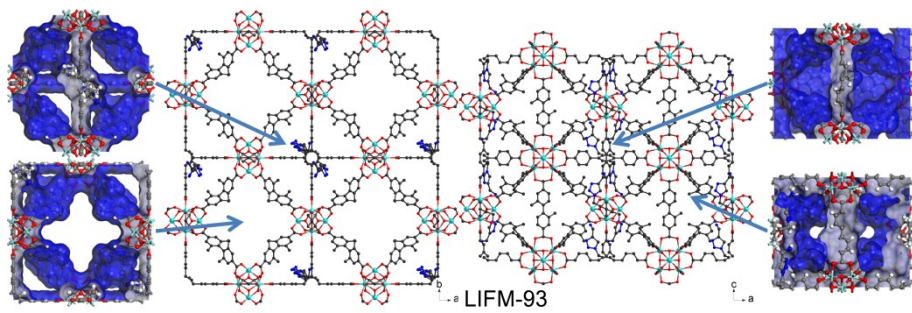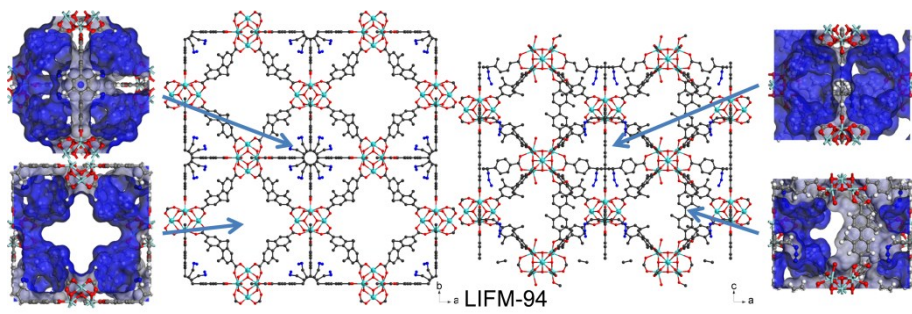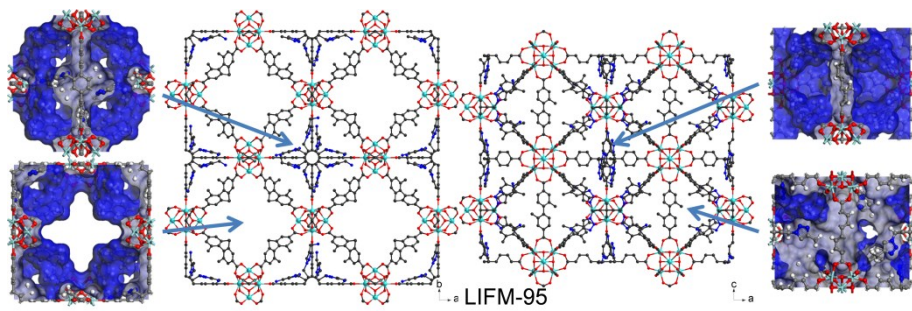

**Fig. S2** Presenting the channels along c-axis and a-/b-axis in PCN-700 and LIFM-90—95. (Structures of LIFM-91, LIFM-93 and LIFM-95 are obtained from a simple simulation with Materials Studio 6.1 and only used for general presentation.<sup>5</sup>)

## S5. Powder X-ray Diffraction

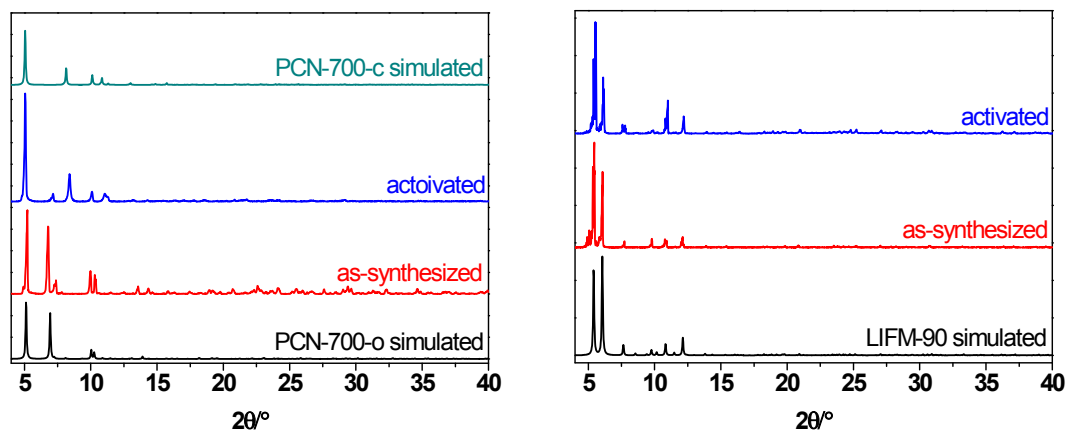

**Fig. S3** PXRD patterns of PCN-700 (left) and LIFM-90 (right).

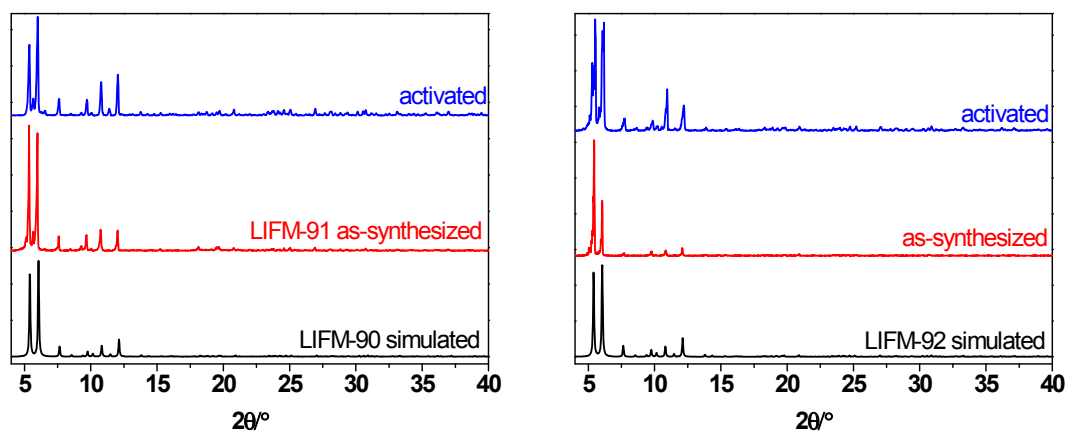

**Fig. S4** PXRD patterns of LIFM-91 (left) and LIFM-92 (right).



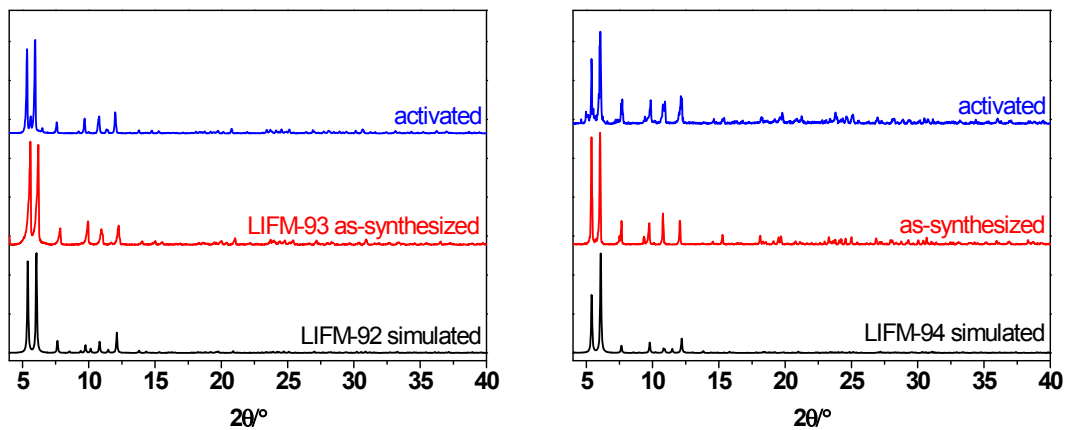

Fig. S5 PXR D patterns of LIFM-93 (left) and LIFM-94 (right).

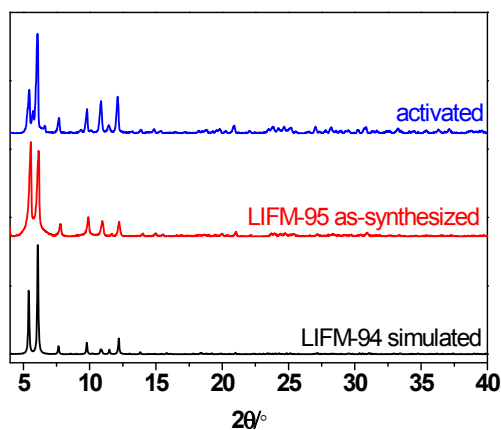

Fig. S6 PXR D patterns of LIFM-95.

## S6. TGA

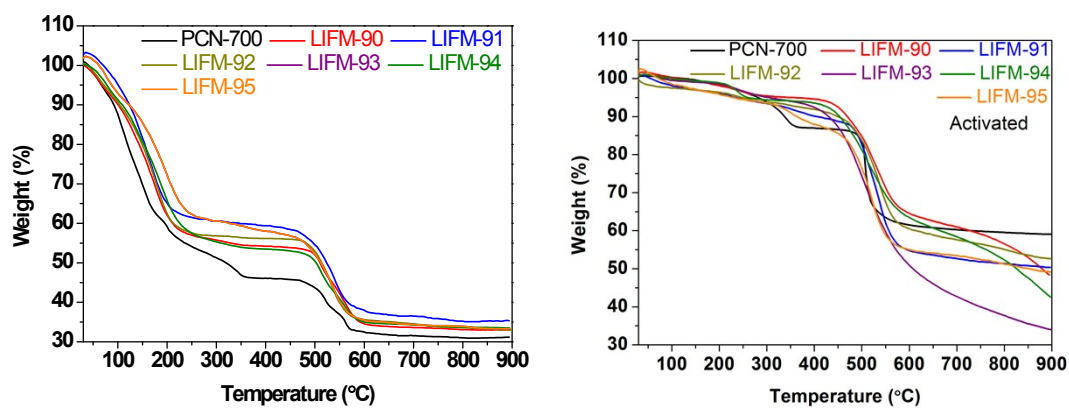

Fig. S7 The thermogravimetric analysis of as-synthesized (left) and activated (right) PCN-700 and LIFM-90—95 under  $N_2$  atmosphere.

## S6. Infrared Spectroscopy

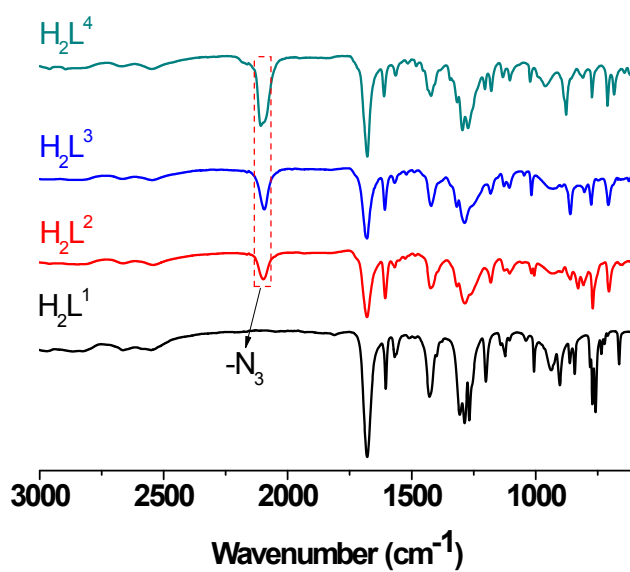

**Fig. S8** Infrared spectra of H<sub>2</sub>L<sup>1</sup>, H<sub>2</sub>L<sup>2</sup>, H<sub>2</sub>L<sup>3</sup> and H<sub>2</sub>L<sup>4</sup>.

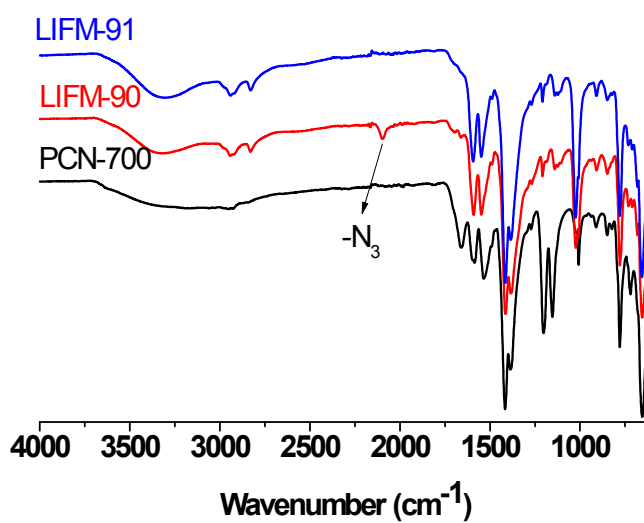

**Fig. S9** Infrared spectra of PCN-700, LIFM-90 and LIFM-91.

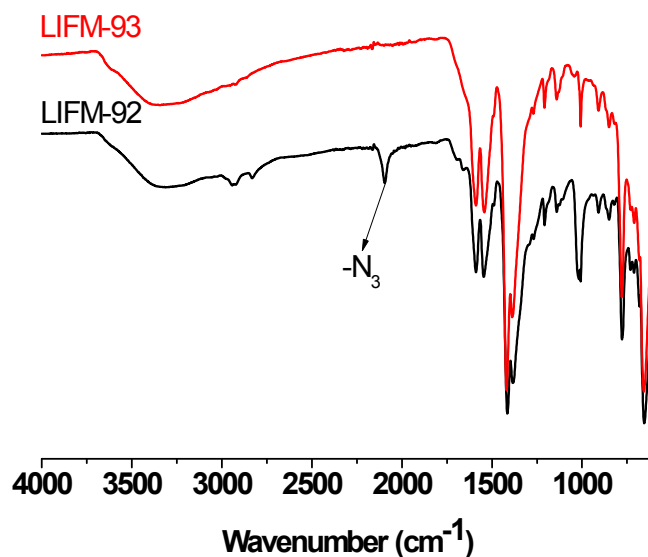

**Fig. S10** Infrared spectra of LIFM-92 and LIFM-93.

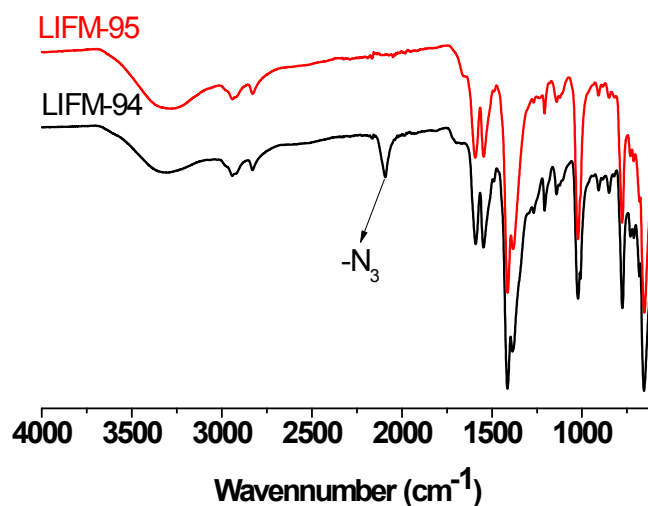

**Fig. S11** Infrared spectra of LIFM-94 and LIFM-95.

## **S7. Porosity, Selectivity and Gas Adsorption Properties**

PCN-700, LIFM-90, LIFM-91, LIFM-92, LIFM-93, LIFM-94 and LIFM-95 were subsequently washed with DMF and immersed in anhydrous methanol for 3 days, during which the solvent was decanted and freshly replenished three times a day. The samples were activated under vacuum at 100 °C for 12 hours. Gas sorption measurements were then conducted using a Quantachrome Autosorb-iQ2-MP gas adsorption analyzer.

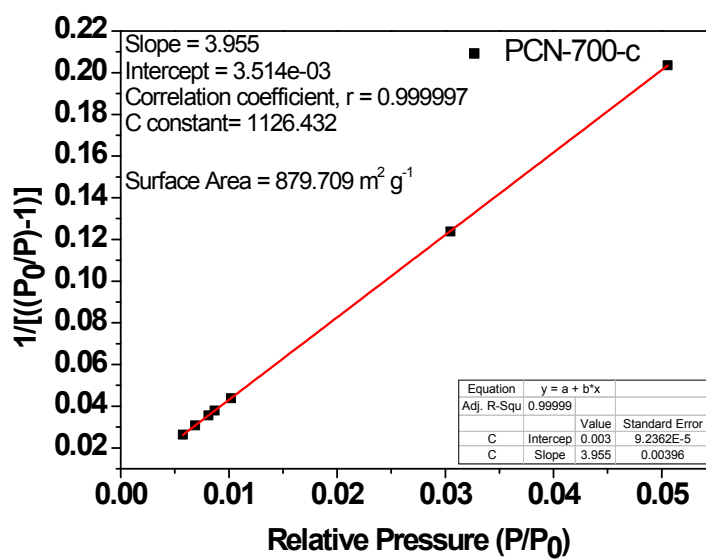

**Fig. S12** Plot of the linear region on the  $\text{N}_2$  isotherm of PCN-700-c for the BET equation.

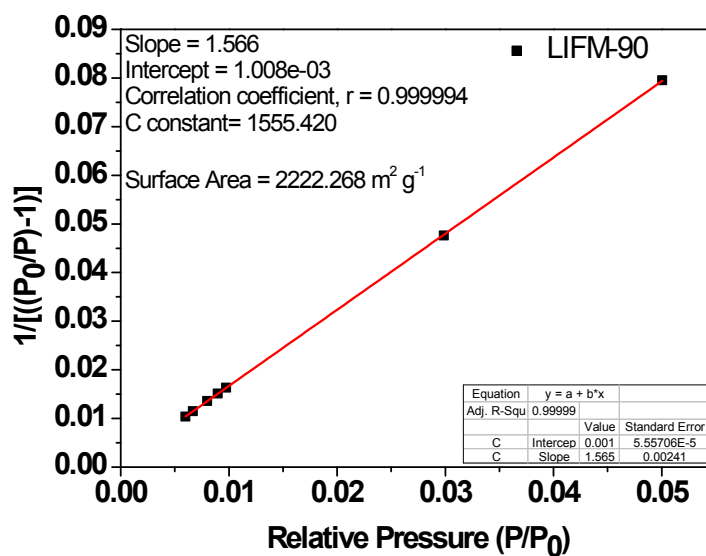

**Fig. S13** Plot of the linear region on the  $\text{N}_2$  isotherm of LIFM-90 for the BET equation.

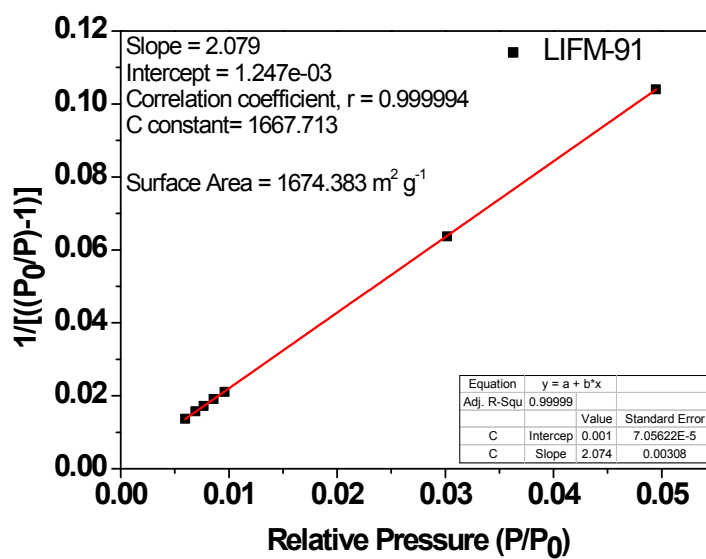

**Fig. S14** Plot of the linear region on the  $\text{N}_2$  isotherm of LIFM-91 for the BET equation.

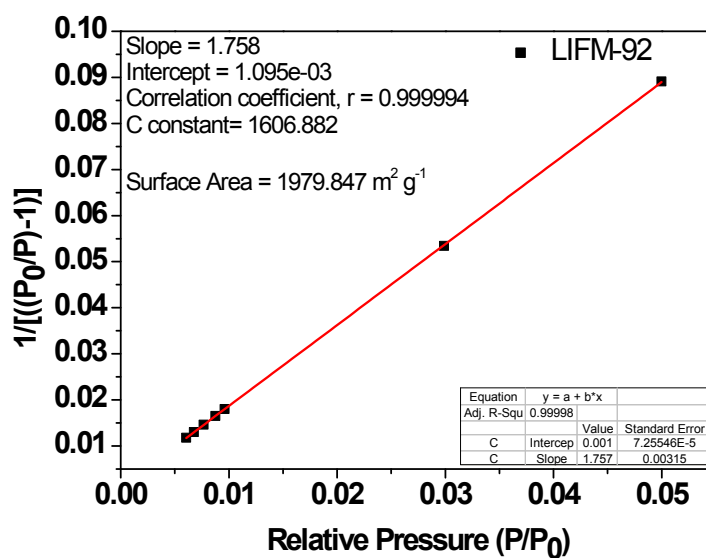

**Fig. S15** Plot of the linear region on the  $\text{N}_2$  isotherm of LIFM-92 for the BET equation.

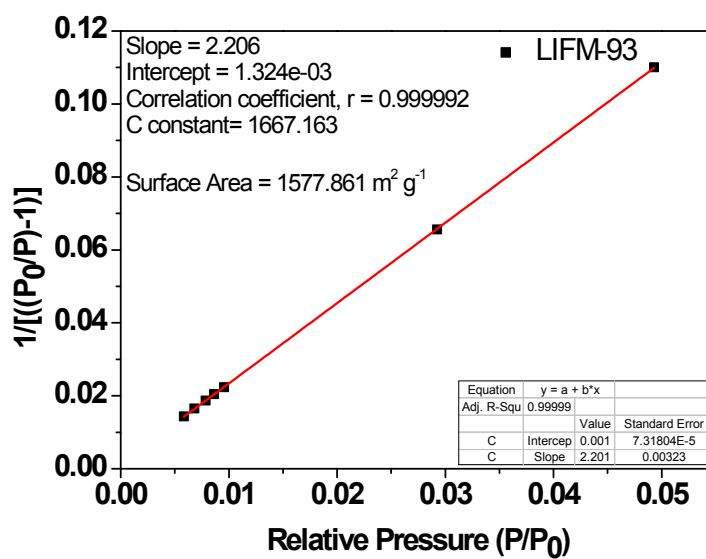

**Fig. S16** Plot of the linear region on the N<sub>2</sub> isotherm of LIFM-93 for the BET equation.

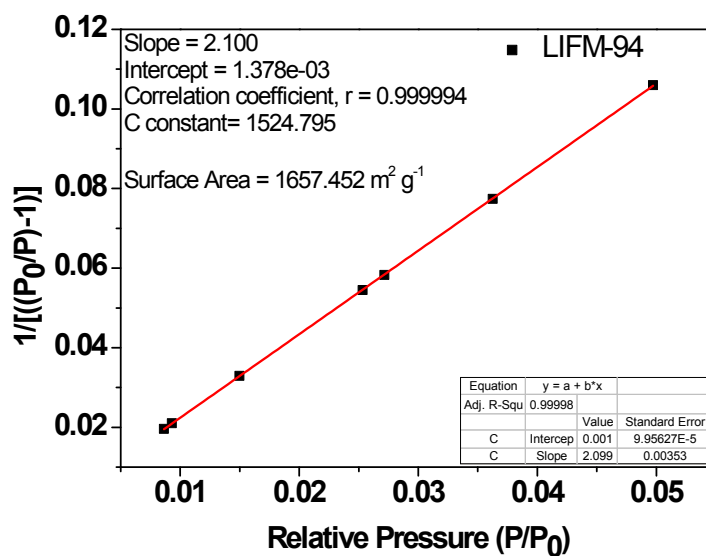

**Fig. S17** Plot of the linear region on the N<sub>2</sub> isotherm of LIFM-94 for the BET equation.

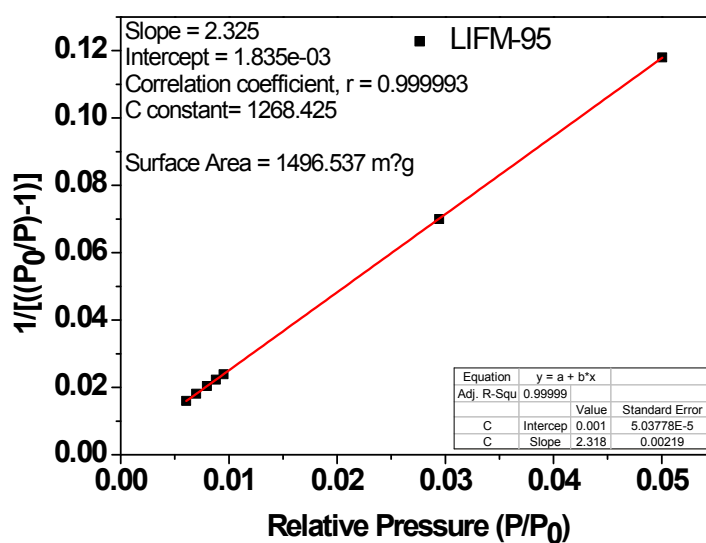

**Fig. S18** Plot of the linear region on the N<sub>2</sub> isotherm of LIFM-95 for the BET equation.

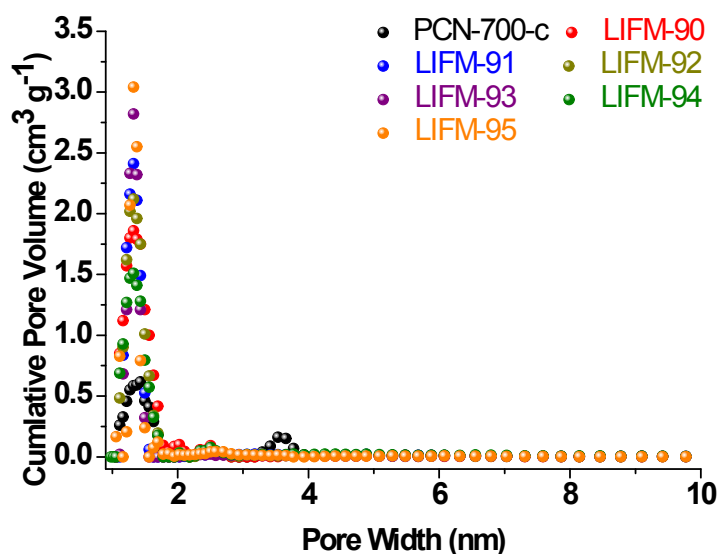

**Fig. S19** Pore size distribution of PCN-700-c, LIFM-90, LIFM-91, LIFM-92, LIFM-93, LIFM-94 and LIFM-95 calculated from SF analysis.

**Table S2** Summary of porosity parameters of PCN-700-c, LIFM-90—95.

| Structure | S <sub>BET</sub> (m <sup>2</sup> /g) | Total Pore Volume (cc/g) | Pore Size by DFT (Å) |
|-----------|--------------------------------------|--------------------------|----------------------|
|           |                                      |                          |                      |

|           |      |      |      |
|-----------|------|------|------|
| PCN-700-c | 879  | 0.41 | 14.3 |
| LIFM-90   | 2222 | 0.92 | 13.2 |
| LIFM-91   | 1674 | 0.74 | 13.2 |
| LIFM-92   | 2175 | 0.84 | 13.2 |
| LIFM-93   | 1577 | 0.69 | 12.7 |
| LIFM-94   | 1657 | 0.77 | 13.2 |
| LIFM-95   | 1496 | 0.63 | 12.7 |

## S8. H<sub>2</sub>, R22, CO<sub>2</sub>, CH<sub>4</sub>, N<sub>2</sub> Sorption Isotherm

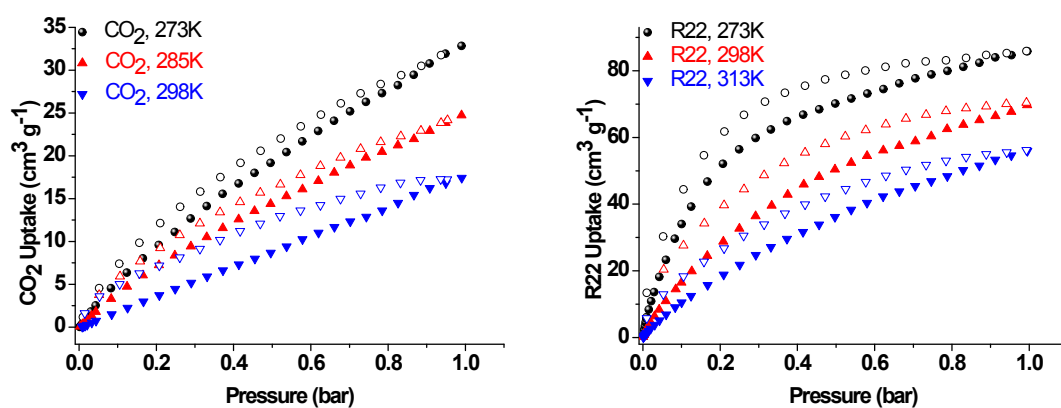

Fig. S20 CO<sub>2</sub> and R22 sorption isotherms of PCN-700-c at three different temperatures. Solid symbols: adsorption; open symbols: desorption.

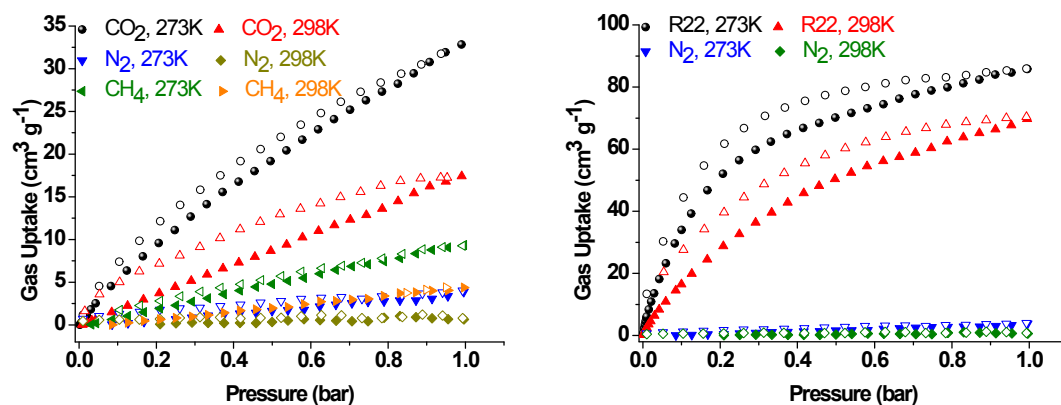



**Fig. S21** CO<sub>2</sub>, R22, N<sub>2</sub> and CH<sub>4</sub> sorption isotherms of PCN-700-c. Solid symbols: adsorption; open symbols: desorption.

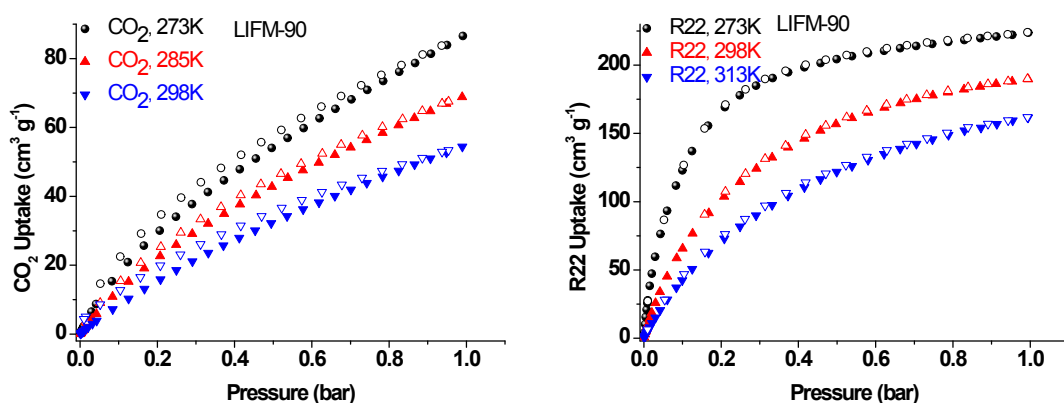

**Fig. S22** CO<sub>2</sub> and R22 sorption isotherms of LIFM-90 at three different temperatures. Solid symbols: adsorption; open symbols: desorption.

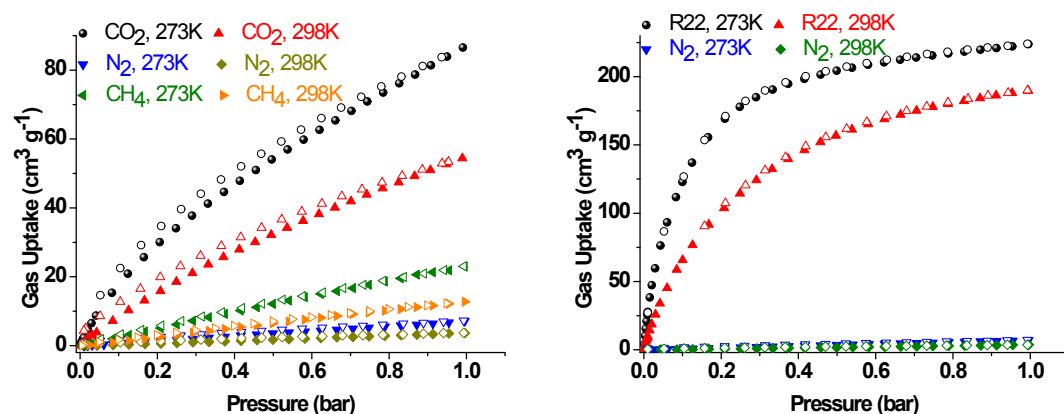

**Fig. S23** CO<sub>2</sub>, R22, N<sub>2</sub> and CH<sub>4</sub> sorption isotherms of LIFM-90. Solid symbols: adsorption; open symbols: desorption.

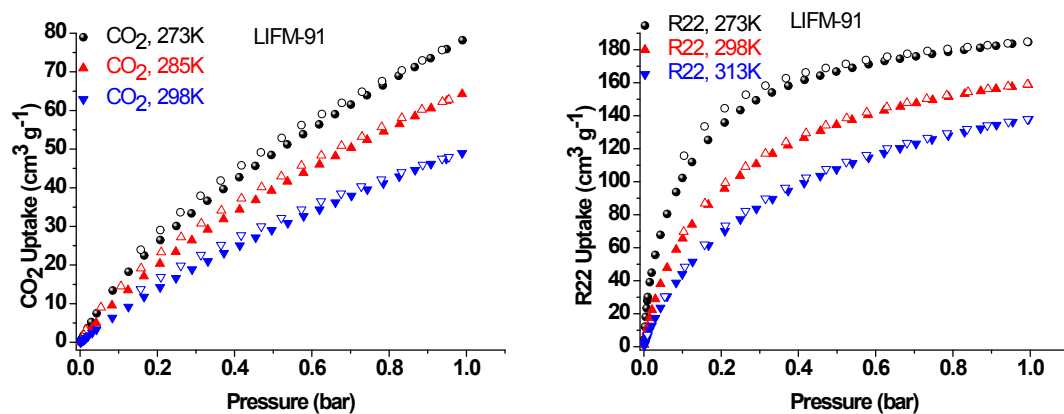

**Fig. S24** CO<sub>2</sub> and R22 sorption isotherms of LIFM-91 at three different temperatures. Solid symbols: adsorption; open symbols: desorption.

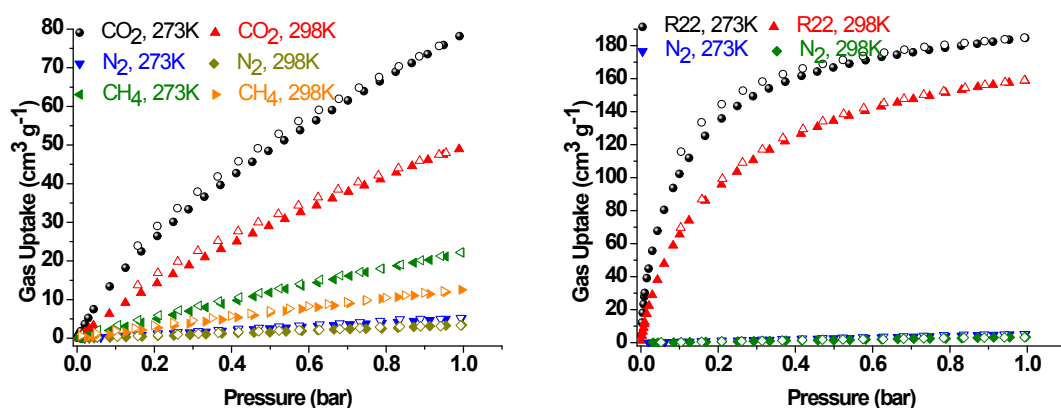

**Fig. S25** CO<sub>2</sub>, R22, N<sub>2</sub> and CH<sub>4</sub> sorption isotherms of LIFM-91. Solid symbols: adsorption; open symbols: desorption.

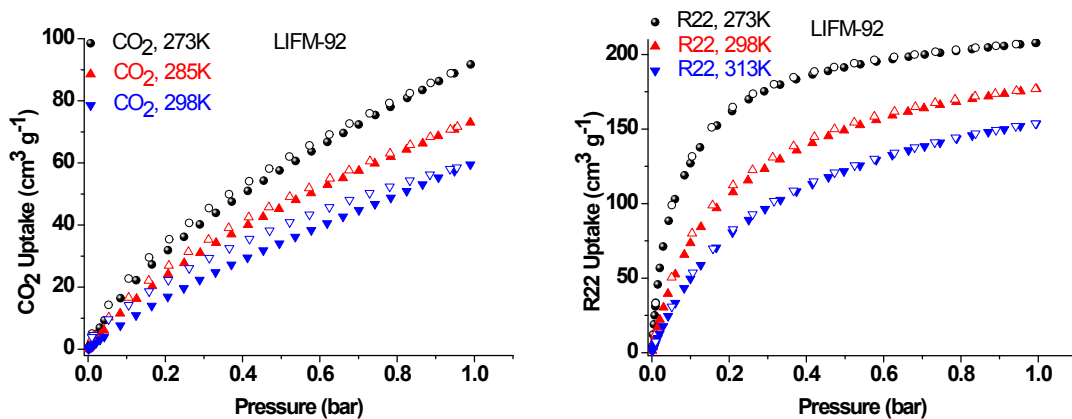

**Fig. S26** CO<sub>2</sub> and R22 sorption isotherms of LIFM-92 at three different temperatures. Solid symbols: adsorption; open symbols: desorption.

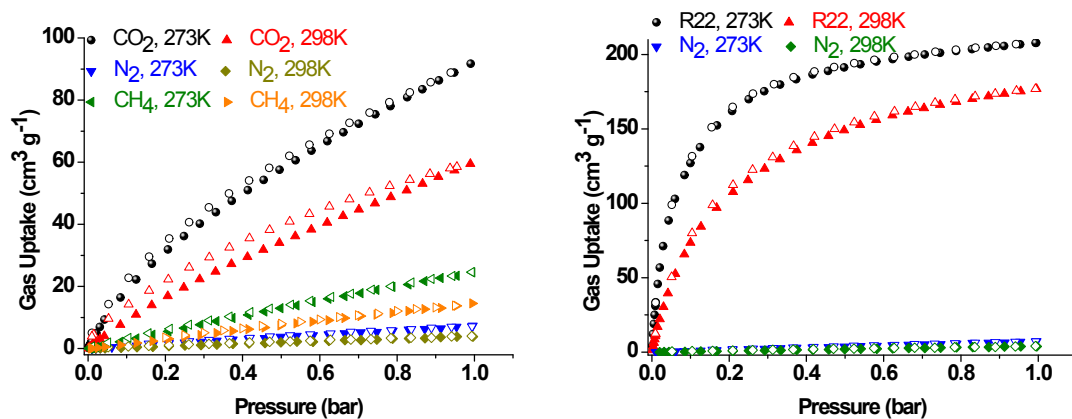

**Fig. S27** CO<sub>2</sub>, R22, N<sub>2</sub> and CH<sub>4</sub> sorption isotherms of LIFM-92. Solid symbols: adsorption; open symbols: desorption.

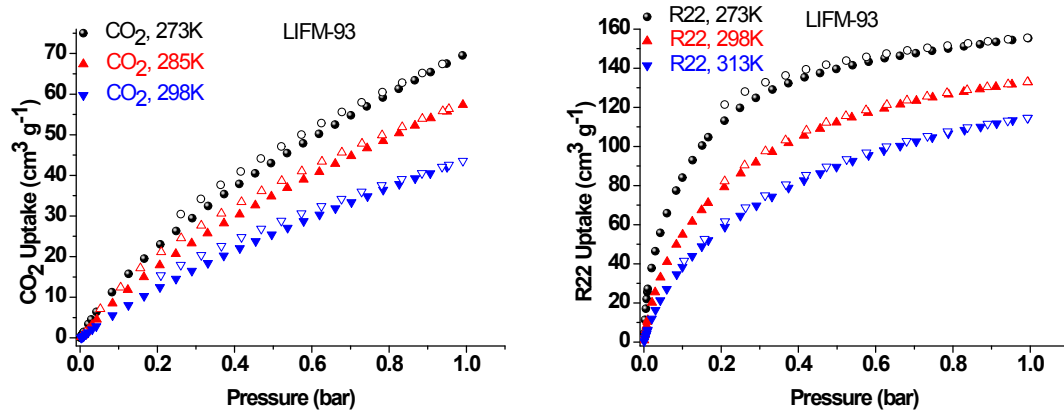

**Fig. S28** CO<sub>2</sub> and R22 sorption isotherms of LIFM-93 at three different temperatures. Solid symbols: adsorption; open symbols: desorption.

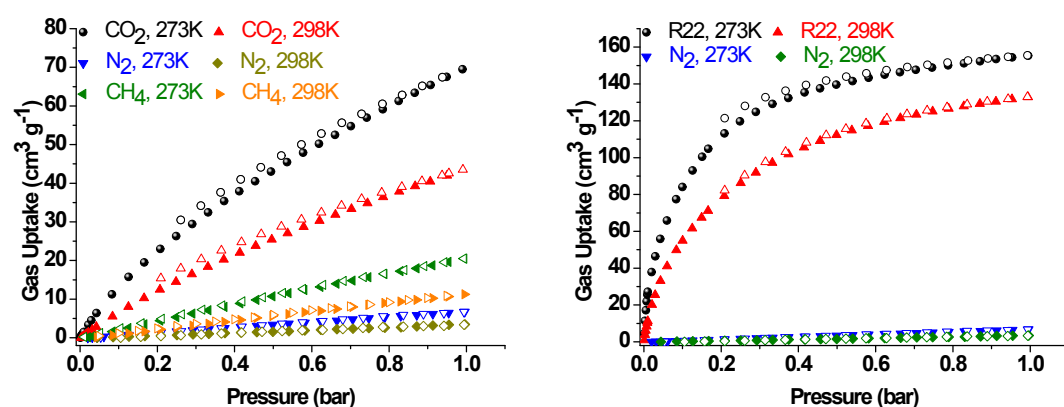

**Fig. S29** CO<sub>2</sub>, R22, N<sub>2</sub> and CH<sub>4</sub> sorption isotherms of LIFM-93. Solid symbols: adsorption; open symbols: desorption.

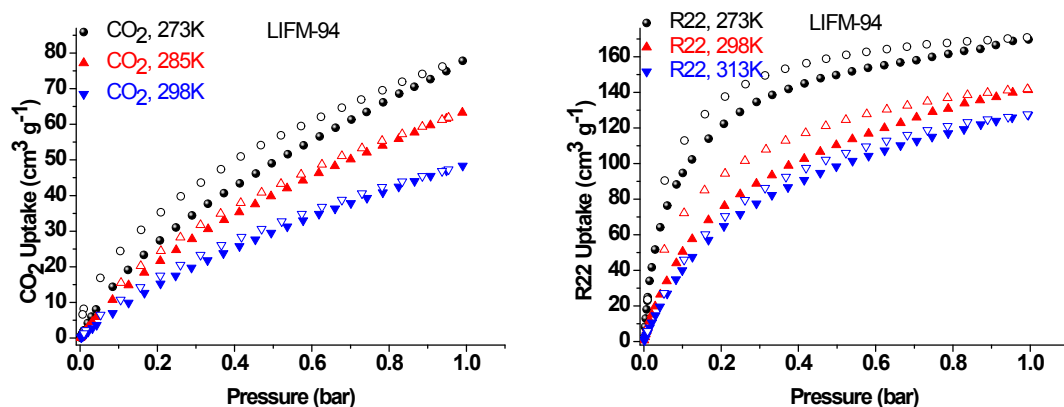

**Fig. S30** CO<sub>2</sub> and R22 sorption isotherms of LIFM-94 at three different temperatures. Solid symbols: adsorption; open symbols: desorption.

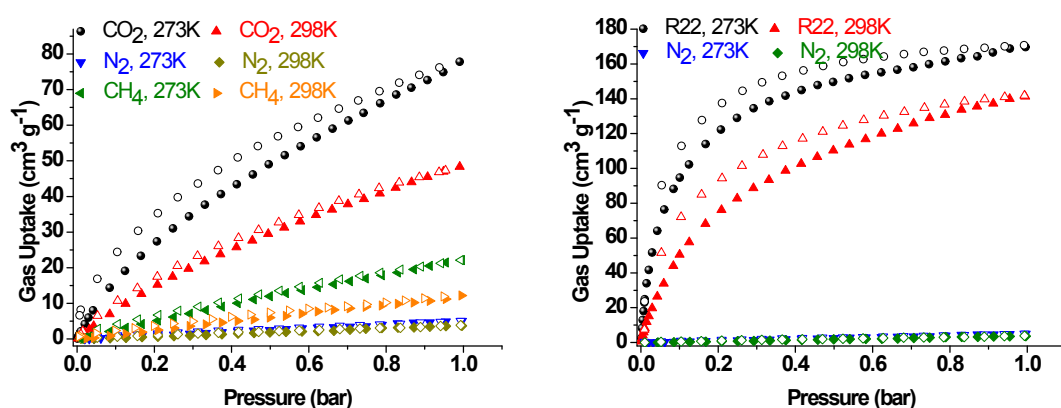

**Fig. S31** CO<sub>2</sub>, R22, N<sub>2</sub> and CH<sub>4</sub> sorption isotherms of LIFM-94. Solid symbols: adsorption; open symbols: desorption.

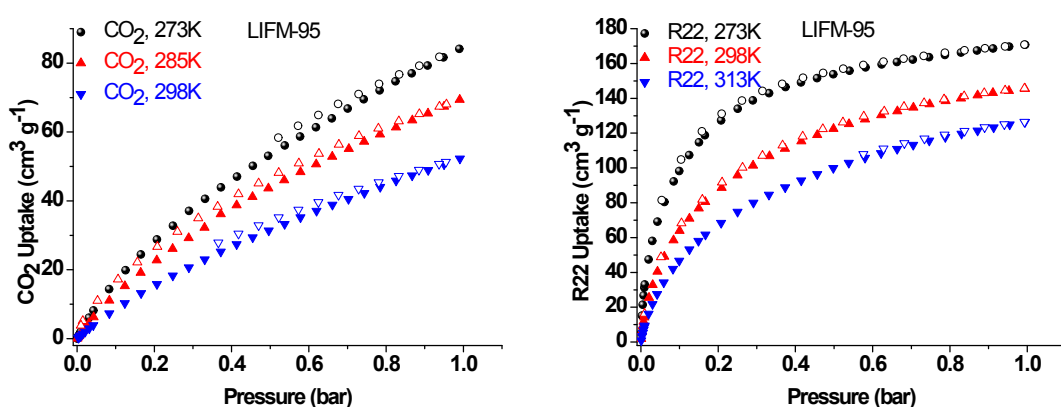

**Fig. S32** CO<sub>2</sub> and R22 sorption isotherms of LIFM-95 at three different temperatures. Solid symbols: adsorption; open symbols: desorption.

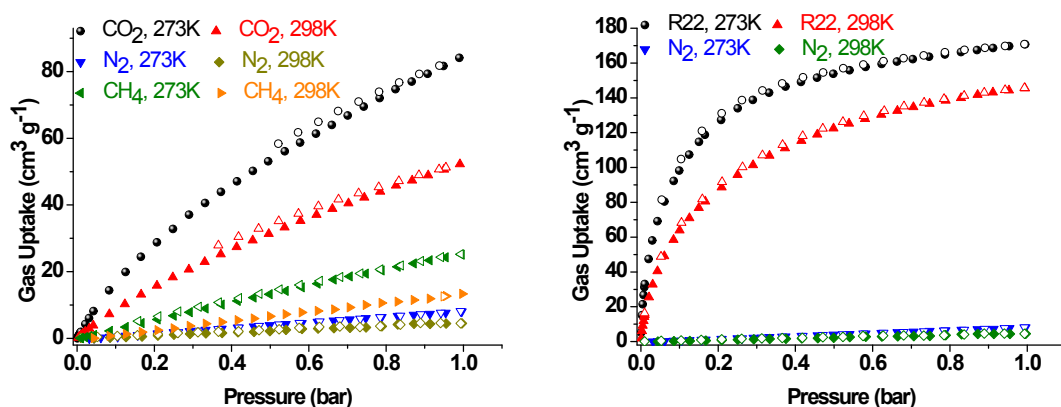

**Fig. S33** CO<sub>2</sub>, R22, N<sub>2</sub> and CH<sub>4</sub> sorption isotherms of LIFM-95. Solid symbols: adsorption; open symbols: desorption.

### S9. Calculations of Adsorption Isothermic Heats:

The isothermic heats of R22 and CO<sub>2</sub> adsorption for PCN-700-c, LIFM-90—95 were calculated from the sorption data measured at three different temperatures by the virial fitting method, respectively. A virial-type expression (eq. 1) which is composed of parameters  $a_i$  and  $b_i$  is used. In eq. 1,  $P$  is the pressure in torr,  $N$  is the adsorbed amount in mmol·g<sup>-1</sup>,  $T$  is the temperature in Kelvin,  $a_i$  and  $b_i$  are the virial coefficients which are independent of temperature, and  $m$  and  $n$  are the numbers of coefficients required to adequately describe the isotherms.

$$\ln P = \ln N + \frac{1}{T} \sum_{i=0}^m a_i N^i + \sum_{i=0}^n b_i N^i \quad \text{eq. 1}$$

The values of the virial coefficients  $a_0$  through  $a_m$  were then applied to calculate the isothermic heat of adsorption (eq 2). In eq. 2,  $Q_{st}$  is the coverage-dependent isothermic heat of adsorption and  $R$  is the universal gas constant.<sup>6</sup>

$$Q_{st} = -R \sum_{i=0}^m a_i N^i \quad \text{eq. 2}$$

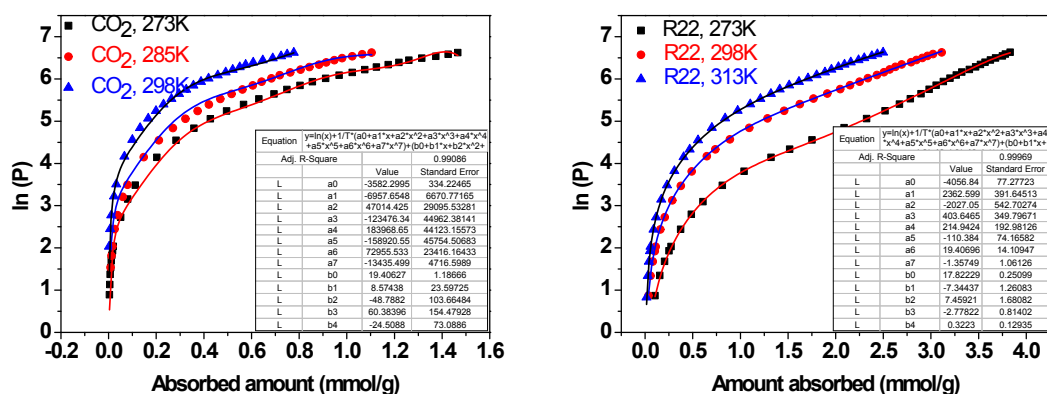

**Fig. S34** CO<sub>2</sub> and R22 fitting (lines) of the adsorption isotherms (points) of PCN-700-c at different temperatures.

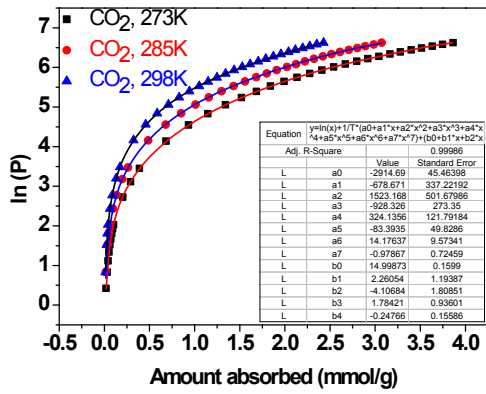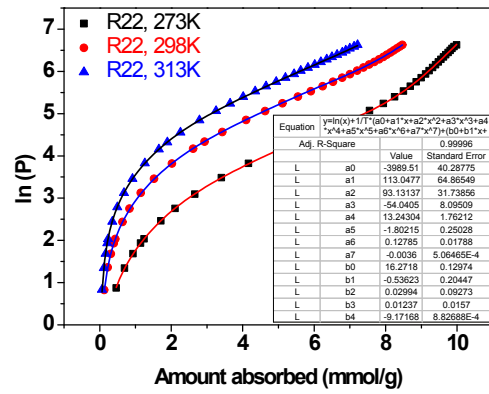

Fig. S35 CO<sub>2</sub> and R22 fitting (lines) of the adsorption isotherms (points) of LIFM-90 at different temperatures.

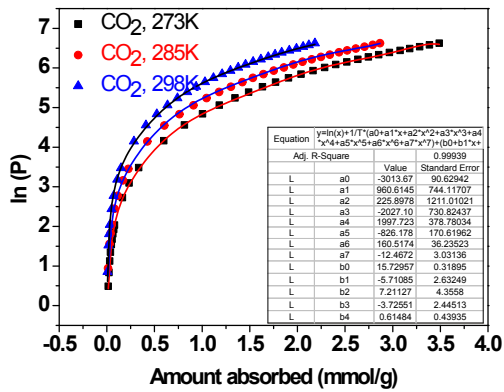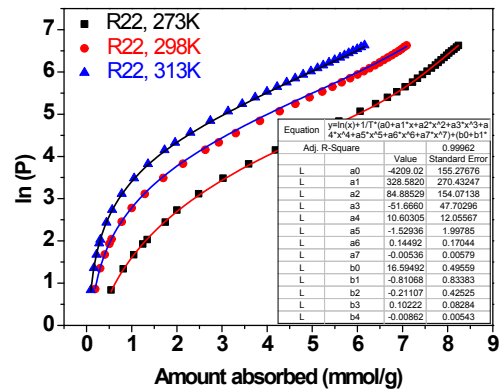

Fig. S36 CO<sub>2</sub> and R22 fitting (lines) of the adsorption isotherms (points) of LIFM-91 at different temperatures.

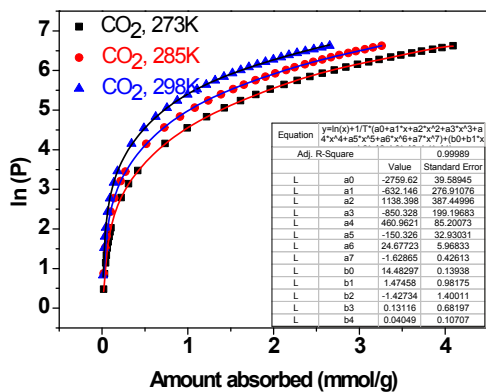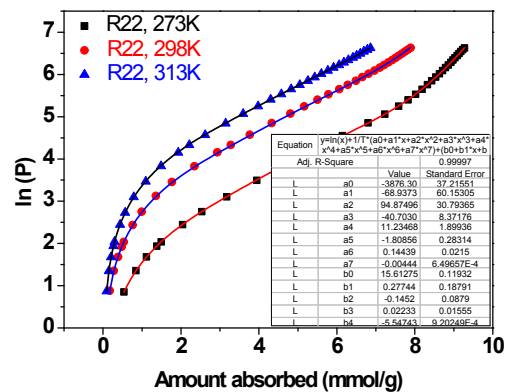

Fig. S37 CO<sub>2</sub> and R22 fitting (lines) of the adsorption isotherms (points) of LIFM-92 at different temperatures.

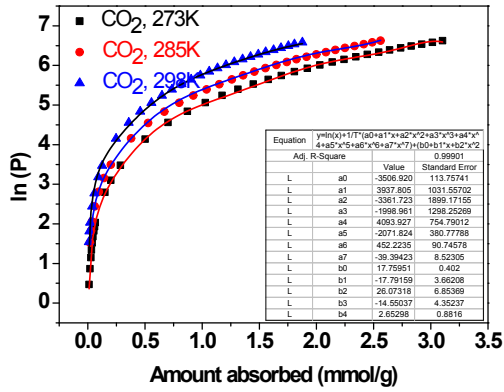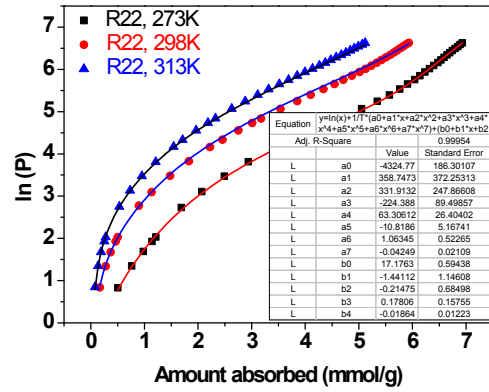

Fig. S38 CO<sub>2</sub> and R22 fitting (lines) of the adsorption isotherms (points) of LIFM-93 at different temperatures.

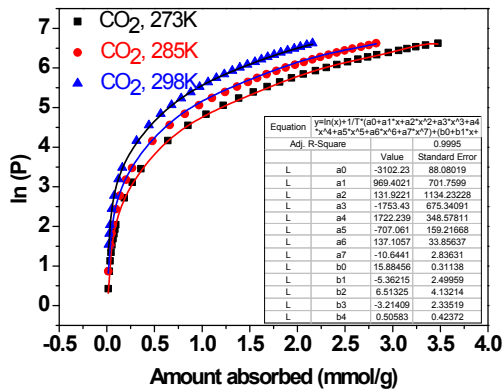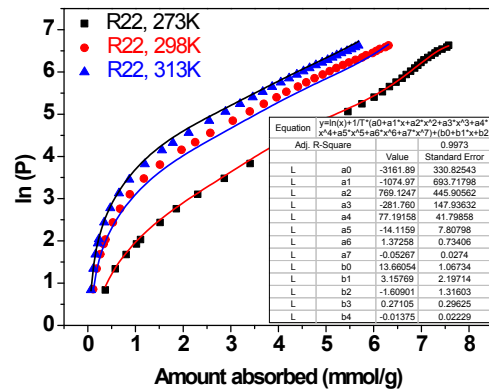

Fig. S39 CO<sub>2</sub> and R22 fitting (lines) of the adsorption isotherms (points) of LIFM-94 at different temperatures.

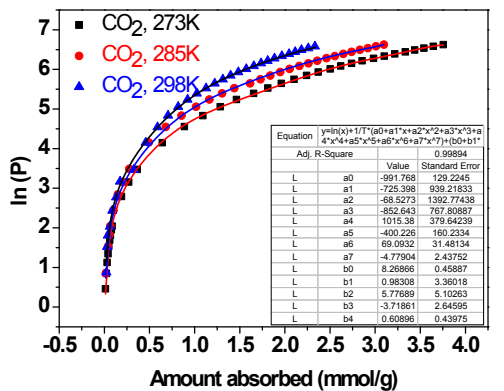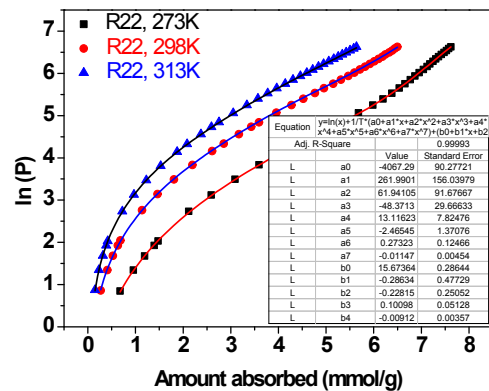

Fig. S40 CO<sub>2</sub> and R22 fitting (lines) of the adsorption isotherms (points) of LIFM-95 at different temperatures.

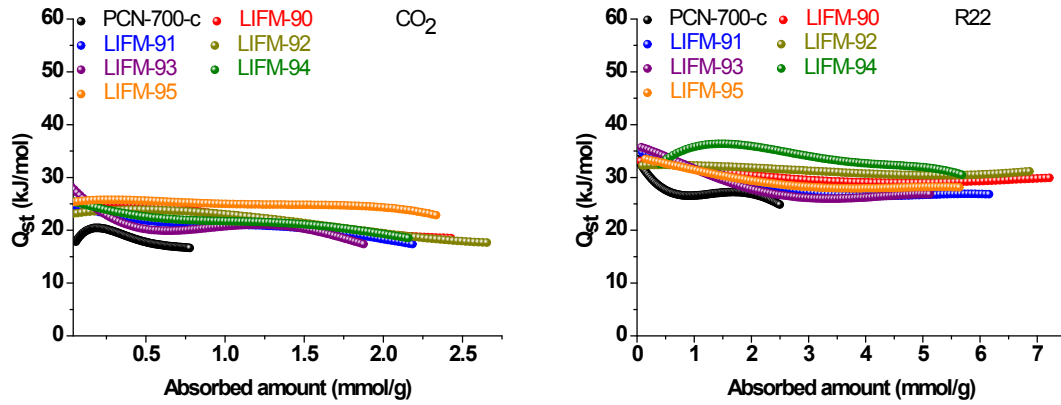

**Fig. S41** CO<sub>2</sub> (left) and R22 (right) isosteric heat of adsorption in PCN-700-c, LIFM-90, LIFM-91, LIFM-92, LIFM-93, LIFM-94 and LIFM-95 as a function of surface coverage.

### S10. R22/N<sub>2</sub>, CO<sub>2</sub>/N<sub>2</sub> and CO<sub>2</sub>/CH<sub>4</sub> Selectivity Calculation via IAST

The experimental isotherm data for pure CO<sub>2</sub> and R22 (measured at 273 K and 298 K) were fitted using a Langmuir Freundlich (LF) model:

$$q = \frac{a * b * p^{1/n}}{1 + b * p^{1/n}} \quad \text{eq. 3}$$

Where  $q$  and  $p$  are adsorbed amounts and pressure of component  $i$ , respectively.

The adsorption selectivities for binary mixtures of R22/N<sub>2</sub>, CO<sub>2</sub>/N<sub>2</sub> and CO<sub>2</sub>/CH<sub>4</sub> defined by

$$S_{ij} = \frac{x_i}{x_j} * \frac{y_j}{y_i} \quad \text{eq. 4}$$

were calculated using the Ideal Adsorption Solution Theory (IAST) of Myers and Prausnitz.<sup>7</sup> Where  $x_i$  is the mole fraction of component  $i$  in the adsorbed phase and  $y_i$  is the mole fraction of component  $i$  in the bulk.



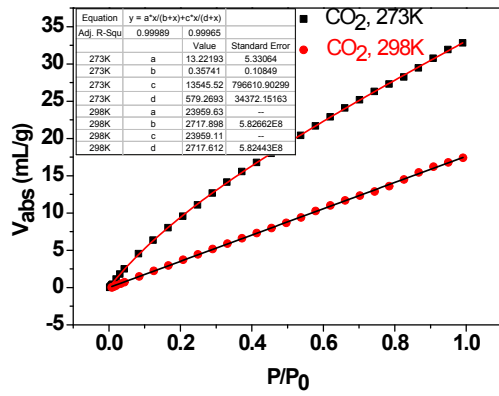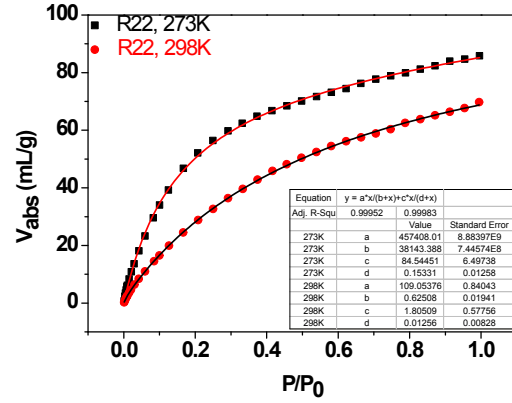

Fig. S42 CO<sub>2</sub>, R22 adsorption isotherms of PCN-700-c with fitting by LF model.

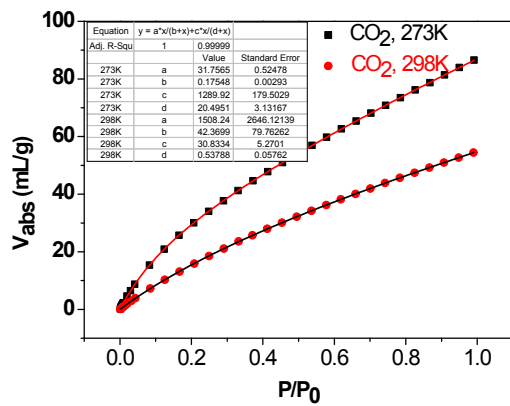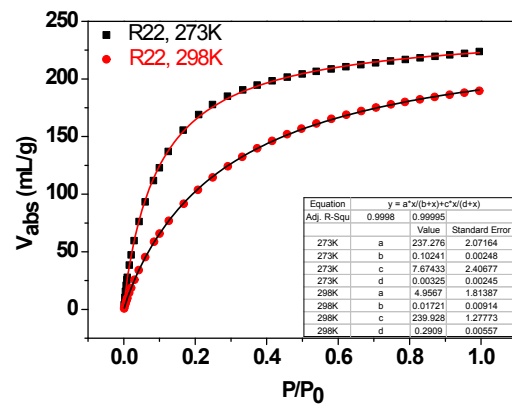

Fig. S43 CO<sub>2</sub>, R22 adsorption isotherms of LIFM-90 with fitting by LF model.

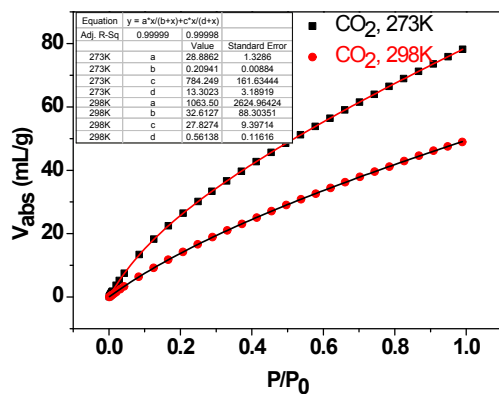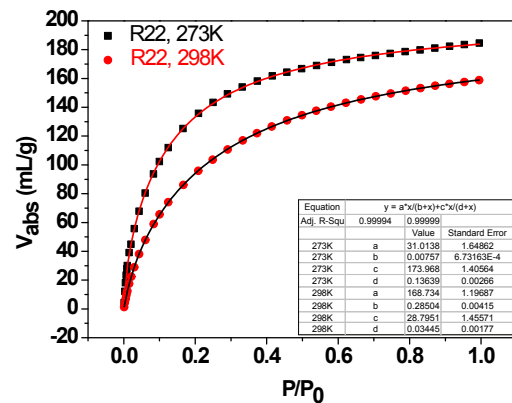

Fig. S44 CO<sub>2</sub>, R22 adsorption isotherms of LIFM-91 with fitting by LF model.

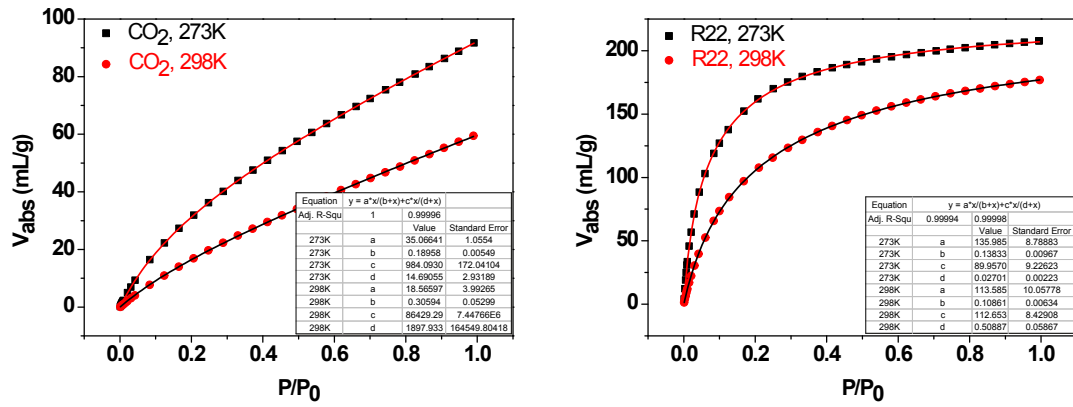

Fig. S45 CO<sub>2</sub>, R22 adsorption isotherms of LIFM-92 with fitting by LF model.

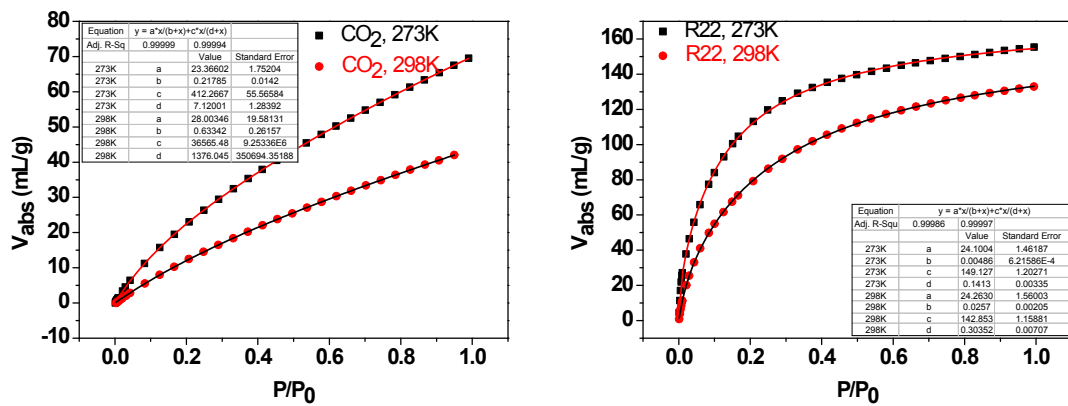

Fig. S46 CO<sub>2</sub>, R22 adsorption isotherms of LIFM-93 with fitting by LF model.

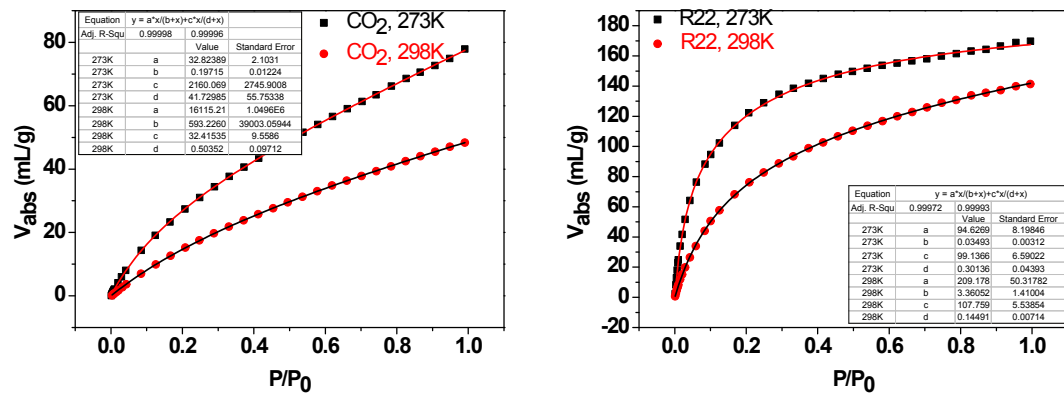

Fig. S47 CO<sub>2</sub>, R22 adsorption isotherms of LIFM-94 with fitting by LF model.

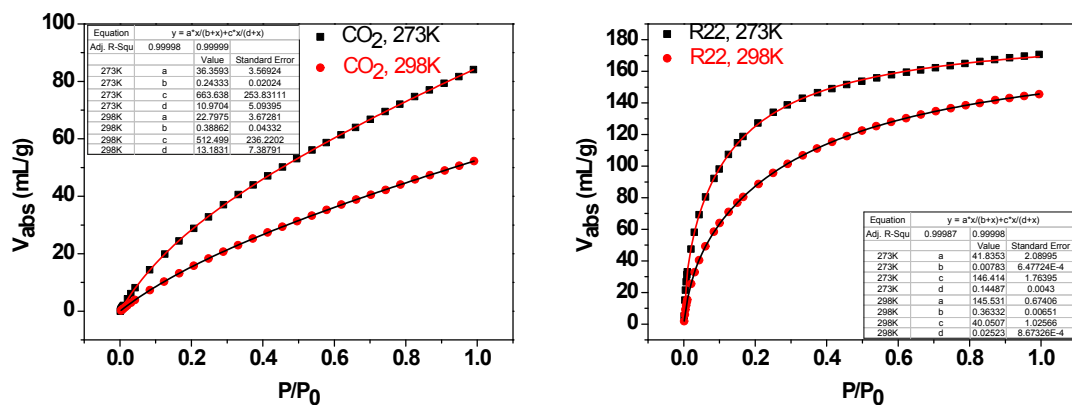

Fig. S48 CO<sub>2</sub>, R22 adsorption isotherms of LIFM-95 with fitting by LF model.

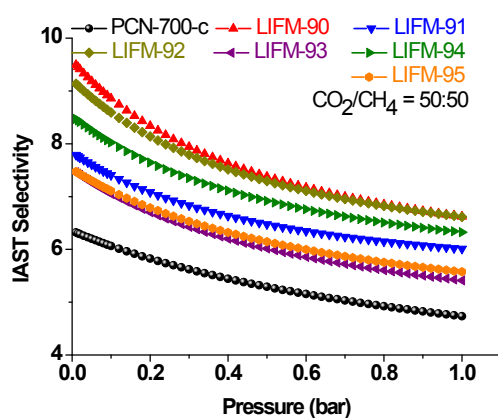

Fig. S49 IAST calculative selectivity of CO<sub>2</sub>/CH<sub>4</sub> on all the MOFs at 273 K.

## S11. <sup>1</sup>H NMR Spectroscopy

For <sup>1</sup>H NMR analysis of LIFM-90, LIFM-92 and LIFM-94, the activated samples (around 10 mg) were digested with sonication in 490 μL DMSO-d<sub>6</sub> and 10 μL of 40% HF.

<sup>1</sup>H NMR spectra for LIFM-90, LIFM-92 and LIFM-94 are presented below.

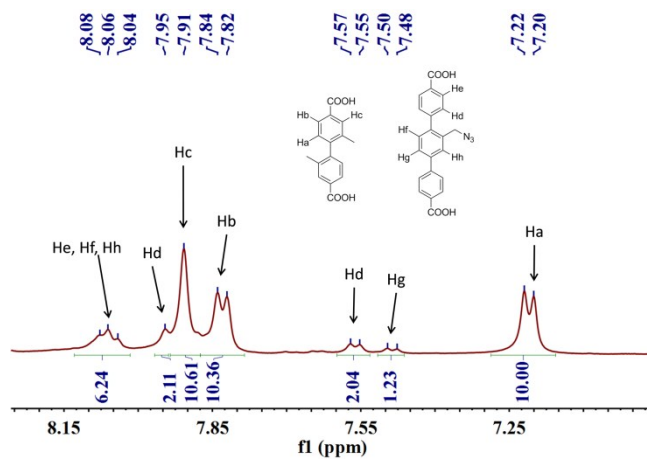

**Fig. S50**  $^1\text{H}$  NMR spectroscopy of digested LIFM-90.

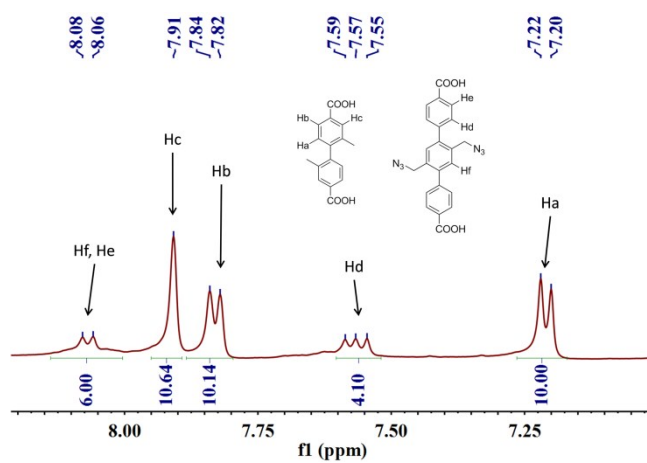

**Fig. S51**  $^1\text{H}$  NMR spectroscopy of digested LIFM-92.

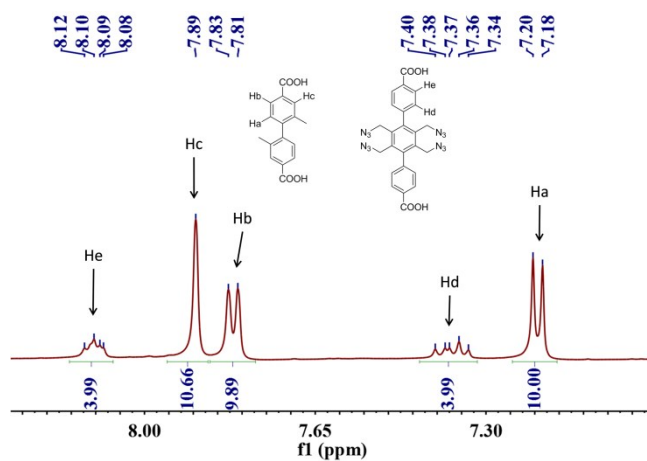

**Fig. S52**  $^1\text{H}$  NMR spectroscopy of digested LIFM-94.

**Table S3** Comparison of spacer ratios from single crystal structure and from  $^1\text{H}$  NMR of digested samples.

| MOF     | Spacer ratios from single crystal structure | Spacer ratios from $^1\text{H}$ NMR and $^{19}\text{F}$ NMR of digested samples <sup>a</sup> |
|---------|---------------------------------------------|----------------------------------------------------------------------------------------------|
| LIFM-90 | $L^1:L^2 = 5:1$                             | $L^1:L^2 = 10.36/2:(2.04/2) = 5.08:1$                                                        |
| LIFM-92 | $L^1:L^3 = 5:1$                             | $L^1:L^3 = 10.14/2:(4.10/4) = 4.95:1$                                                        |
| LIFM-94 | $L^1:L^4 = 5:1$                             | $L^1:L^4 = 9.89/2:(3.99/4) = 4.96:1$                                                         |

<sup>a</sup> Based on integral area of corresponding H peaks.

### S16 Regeneration of LIFM-92 and LIFM-93

LIFM-92 and LIFM-93 are selected as representative to demonstrate that these MOFs can be regenerated under mild conditions. The samples of LIFM-92 and LIFM-93 are vacuumed at room temperature for regeneration after each run of gas adsorption. The repeated  $\text{CO}_2$  and R22 adsorptions for these two MOFs are plotted below.

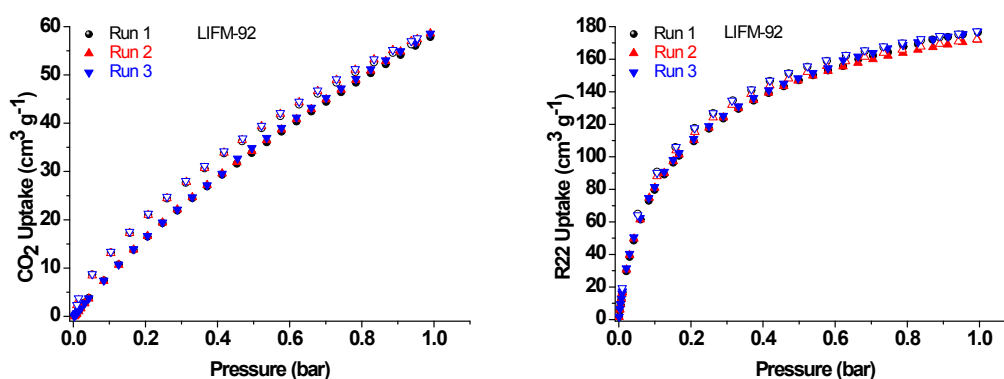

**Fig. S53** Repeated  $\text{CO}_2$  and R22 sorption isotherms of LIFM-92 at 298K after regeneration. Solid symbols: adsorption; open symbols: desorption.

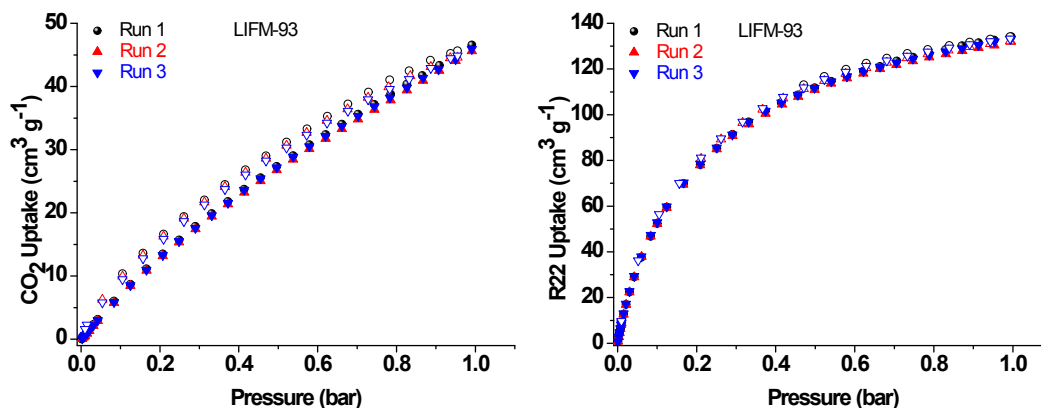

**Fig. S54** Repeated CO<sub>2</sub> and R22 sorption isotherms of LIFM-93 at 298K after regeneration. Solid symbols: adsorption; open symbols: desorption.

## S17 References

- 1 S. Yuan, W. Lu, Y.-P. Chen, Q. Zhang, T.-F. Liu, D. Feng, X. Wang, J. Qin and H.-C. Zhou, *J. Am. Chem. Soc.*, 2015, **137**, 3177.
- 2 H.-L. Jiang, D. Feng, T.-F. Liu, J.-R. Li and H.-C. Zhou, *J. Am. Chem. Soc.*, 2012, **134**, 14690.
- 3 P. V. Dau, S. M. Cohen, *Inorg. Chem.* **2015**, *54*, 3134.
- 4 N. Ko, J. Hong, S. Sung, K. E. Cordova, H. J. Park, J. K. Yang, J. Kim, *Dalton Trans.* **2015**, *44*, 2047.
- 5 *Accelrys Materials Studio Release Notes, Release 6.1.0*; Accelrys Software, Inc. , San Diego, 2012.
- 6 L. Czepirski, J. J., *Chem. Eng. Sci.* **1989**, *44*, 797.
- 7 Myers, A. L.; Prausnitz *J. M. AIChE.* **1965**, *11*, 121.
